# Supplementary material
Source: HighWire-hosted journal article supplement (https://cmaj.ca/highwire/filestream/59352/field_highwire_adjunct_files/1/141614-guide-at-2.pdf)
Supplement: 141614-guide-at-2.pdf [file 141614-guide-at-2.pdf]

| <b>Appendix 2: Anticoagulant options for initial management of iliofemoral deep vein thrombosis</b>                                                                                  |                                                                                                                                                                                    |
|--------------------------------------------------------------------------------------------------------------------------------------------------------------------------------------|------------------------------------------------------------------------------------------------------------------------------------------------------------------------------------|
| Treatment                                                                                                                                                                            | Suggested dosing regimen                                                                                                                                                           |
| Unfractionated heparin <sup>1,2</sup>                                                                                                                                                | SC administration: 333 IU/kg bolus, followed by 250 IU/kg SC twice daily<br>IV administration: 80 IU/kg bolus, followed by 18 IU/kg per hour infusion                              |
| Low-molecular-weight heparin <sup>3</sup>                                                                                                                                            | Dalteparin: 200 IU/kg SC once daily<br>Enoxaparin: 1.5 mg/kg SC once daily or 1 mg/kg SC twice daily<br>Tinzaparin: 175 IU/kg SC once daily<br>Nadroparin: 171 IU/kg SC once daily |
| Fondaparinux <sup>1</sup>                                                                                                                                                            | Body weight < 50 kg: 5 mg SC daily<br>Body weight 50–100 kg: 7.5 mg SC daily<br>Body weight > 100 kg: 10 mg SC daily                                                               |
| Rivaroxaban* <sup>4,5</sup>                                                                                                                                                          | 15 mg PO twice daily for 21 days, then 20 mg PO once daily                                                                                                                         |
| Apixaban* <sup>6</sup>                                                                                                                                                               | 10 mg twice daily for 7 days, followed by 5 mg twice daily                                                                                                                         |
| Note: IV = intravenous, PO = by mouth (orally), SC = subcutaneous.<br>*Rivaroxaban and apixaban should not be used for initial treatment of iliofemoral DVT in patients with cancer. |                                                                                                                                                                                    |

## References

1. Garcia DA, Baglin TP, Weitz JI, et al. Parenteral anticoagulants: antithrombotic therapy and prevention of thrombosis, 9th ed: American College of Chest Physicians Evidence-Based Clinical Practice Guidelines [published errata: *Chest* 2012;141:1369 and *Chest* 2013;144:721]. *Chest* 2012;141(2 Suppl):e24S-e43S.
2. Holbrook A, Schulman S, Witt DM, et al. Evidence-based management of anticoagulant therapy : antithrombotic therapy and prevention of thrombosis, 9th ed: American College of Chest Physicians Evidence-Based Clinical Practice Guidelines. *Chest* 2012;141(2 Suppl):e152S-e184S.
3. Thomson P, Brocklebank C, Semchuk W. Treatment dosing of low-molecular weight heparins and the dose cap dilemma: considerations for patients in Canada. *Can J Hosp Pharm* 2009;62:367-74.
4. Bauersachs R, Berkowitz SD, Brenner B, et al. Oral rivaroxaban for symptomatic venous thromboembolism. *N Engl J Med* 2010;363:2499-510.
5. Büller HR, Prins MH, Lensin AW, et al. Oral rivaroxaban for the treatment of symptomatic pulmonary embolism. *N Engl J Med* 2012;366:1287-97.
6. Agnelli G, Buller HR, Cohen A, et al. Oral apixaban for the treatment of acute venous thromboembolism. *N Engl J Med* 2013;369:799-808.
